# Supplementary material for: Computational prediction and analysis of protein γ-carboxylation sites based on a random forest method
Source: Royal Society of Chemistry journal article supplement (doi:10.1039/c2mb25185j), 2012-07-17
Supplement: c2mb25185j.docx [file c2mb25185j.docx]

**Supporting Information**

Supporting Information S1. The training dataset consisting of the 115 positive samples and 251 negative samples, the testing dataset consisting of the 34 positive samples and 84 negative samples, with each having the 666 feature components.

Supporting Information S2. This file contains two sheets. The first one shows the MaxRel feature table ranked according to the relevance between the features and the class of the samples. The second one shows the mRMR feature table ranked according to the redundancy and relevance to the features of the samples.

Supporting Information S3. The sensitivity (Sn), specificity (Sp), accuracy (Ac), Matthews’s correlation coefficient (MCC) generated by each run of the IFS.

Supporting Information S4. The optimal 327 features selected by IFS.
